# Supplementary material for: Impact of COVID-19-related disruptions to measles, meningococcal A, and yellow fever vaccination in 10 countries
Source: eLife journal article supplement (doi:10.7554/elife.67023), 2021-06-24
Supplement: supp [file elife_poa_e67023_Group_Authorship_Contributors_file.docx]

**VIMC Working Group on COVID-19 Impact on Vaccine Preventable Disease**

Andre Arsene Bita Fouda, World Health Organization - Regional Office for Africa, Brazzaville, Republic of Congo

Felicity Cutts, London School of Hygiene & Tropical Medicine, London, United Kingdom

Emily Dansereau, Bill & Melinda Gates Foundation, Seattle, United States

Antoine Durupt, World Health Organization, Geneva, Switzerland

Ulla Griffiths, United Nations Children’s Fund, New York, United States

Jennifer Horton, World Health Organization, Geneva, Switzerland

Kendall Krause, Bill & Melinda Gates Foundation, Seattle, United States

Katrina Kretsinger, World Health Organization, Geneva, Switzerland

Tewodaj Mengistu, Gavi, the Vaccine Alliance, Geneva, Switzerland

Imran Mirza, United Nations Children’s Fund, New York, United States

Simon R Procter, London School of Hygiene & Tropical Medicine, London, United Kingdom

Stephanie Shendale, World Health Organization, Geneva, Switzerland
